# Supplementary material for: The gain and loss of chromosomal integron systems in the Treponema species
Source: PubMed Central journal article supplement (PMC3607928; doi:10.1186/1471-2148-13-16), 2013-01-22
Supplement: 1471-2148-13-16-S1.pdf [file 1471-2148-13-16-S1.pdf]

This document contains Supplementary Figs 1–2, and Supplementary Tables 1–5.

## The Gain and Loss of Chromosomal Integron Systems in the *Treponema* Species

Yu-Wei Wu, Thomas G. Doak, and Yuzhen Ye

|                                            | 146                                                             | 161 |     |
|--------------------------------------------|-----------------------------------------------------------------|-----|-----|
| <i>T. succinifaciens</i> DSM 2489          | NVVHAKKTRIPVVFVSRQEVSKIIGNL-TGTKKLI AKLLYGTGIRLNEALSRLRIDIDFD   |     |     |
| <i>T. denticola</i> ATCC 35405             | NIVRAKKPKKLPAMTREETAKIFSLPNDYGLLIRLLYGTGMRLMEALRLRIQDIDFG       |     |     |
| <i>T. vincentii</i> ATCC 35580             | NIIRAKSKKLPVLSREETAKEIFSLPNDYGLFIRLLYGTGMRLMESLRLRVQDIDFD       |     |     |
| <i>T. brennaborensis</i> DSM 12168         | SVIRAKKTVHIVPVVFSKDEVRAIFDQL-SDEKLLIAQLLYGTGMRLSECLRLRIQDIDFA   |     |     |
| <i>V. cholerae</i> M66-2                   | RFQKSLTEKRLPVVLTTRDEIRLLEIV-DPKHQLPIKLLYGSGLRIMECLRLRVQDIDFD    |     |     |
| <i>V. parahaemolyticus</i> RIMD 2210633    | RFQKSLTEKRLPVVLTTRDEIRLLEIV-DPKHQLPIKLLYGSGLRIMECLRLRVQDIDFD    |     |     |
| <i>V. fischeri</i> MJ11                    | EFKRSKATKLPVTFVSHSEASVINEL-NHPKLIQAQLMYGSGIRINEALRLRVDDIDLI     |     |     |
| <i>V. vulnificus</i> CMCP6                 | KFQKSLDRKLPVVLTKPELRAFIQHI-DPRYKLIHMLLYGSGIRVMECVRLRIQDIDYH     |     |     |
| <i>V. splendidus</i> LGP32                 | QFRSDKSRKSPVTMTPEEIGRFFNH-C-SPNFKLPYQLMYGSGIRIMECLRLRMQDIDYD    |     |     |
| <i>P. haloplanktis</i> TAC125              | GFIKSKRATKLPVVLTRDEIRLLEIV-DPKHQLPIKLLYGSGLRIMECLRLRVQDIDFD     |     |     |
| <i>P. alcaligenes</i> ATCC 55044           | GVIRARRPQRLPVVLTREEVASVLAQL-DGTLWLIASLLYGSGLRIMECLRLRVKDVFEA    |     |     |
| <i>P. stutzeri</i> A1501                   | DVVRAKQPQRLPVVLTVEEVSALAQL-ESEPWVCSLLYGTGMRLMEALRLRVKDVDFS      |     |     |
| <i>S. denitrificans</i> OS217              | QFPYAKAPKRIQVLSNEEAALIIISNL-SGYHYLIGAILFGSGIRLKEALKLRVKDIDLT    |     |     |
| <i>Shewanella</i> MR-7                     | GFCYATKQRHLPTVLSPEISLILNEL-DGRDKLIEELLYGSGIRVSECLRLRIQDIDIE     |     |     |
| <i>S. oneidensis</i> MR-1                  | GFCYATKQRHLPTVLSPEISLILNEL-DGRDKLIEELLYGSGIRVSECLRLRIQDIDIE     |     |     |
| <i>S. degradans</i> 2-40                   | AYTPSSKHKLPVTFVSHDEAMRVI SHL-QGVHQLVLMYGSGLRIMEAVRLRVQDIDFA     |     |     |
| <i>X. campestris</i> pv. <i>begoniae</i>   | NLVRARPRRIPAVLWREVARLLAVL-EGPCWLMASLPYGSGLRIMECLRLRIMDVDA       |     |     |
| <i>X. campestris</i> pv. <i>campestris</i> | NLVRARPRRIPVLSVEEVTRLLTML-EGACRLMAGLLYGSGLRIMECLRLRIKDVDMV      |     |     |
| <i>N. europaea</i> ATCC 19718              | KVVRARQPQRLPVVLTTRTEVQAILVRM-SGTYGLMANLLYGTGMRLMECLRLRVKDVDFE   |     |     |
| <i>Azoarcus</i> ebN1                       | GITRARESKRPLPVVMTQRETOALLRHV-HGTSGTIIKLLYGTGMRLLEGLRLRVKIDILE   |     |     |
| <i>G. metallireducens</i> GS-15            | DVEQAKKQRLPVVLTVEEVQALLSRL-TGTHALMGRMLYGTGMRLMETVRLRVKDVDFE     |     |     |
| <i>R. gelatinosus</i> IL144                | EIGRPVPKRRLPVVLSPAEVAVALDRL-DGTHRLGELLYGTGIRITEALQRLRVKIDIFA    |     |     |
| <i>R. baltica</i> SH1                      | EAIRANKDSMPTVMSPEEVGVFEGL-EGVYLVIAKLLYGCGRMIRISETHRLRVKIDIFA    |     |     |
| <i>K. stuttgartiensis</i>                  | KVIRARKEPRLPVVLTTRTEVQAILVRM-SGTYGLMANLLYGTGMRLMECLRLRVQDIDFS   |     |     |
| <i>B. marina</i> DSM 3645                  | GVVRARRPKRPLPVVLTVEEVSRVMVHL-TSDKWLIAMLLYGGGIRLLEALRMRVKDIDFE   |     |     |
| <i>C. phaeobacteroides</i> DSM 266         | HLIRARKEPRLPVVLTTRTEVQAILVRM-SGTYGLMANLLYGTGMRLMECLRLRVQDIDFS   |     |     |
| <i>C. phaeobacteroides</i> BS1             | ATVRSNRPKRPLPVVLSREEVRSILEIM-NEVTWLMASLLYGGGIRLLEALRMRVKDIDFD   |     |     |
| <i>Synechococcus</i> sp.                   | GVVRARQPQRLPVVLTVEEVQALLSRL-TGTHALMGRMLYGTGMRLMETVRLRVKDVDFE    |     |     |
| <i>S. ruber</i> DSM 13855                  | PLDRADREPKRPLPVVLSREEVQQLFAALSFGPNRLTAHLLYGSGLRILSEALRLRVKIDIVG |     |     |
|                                            | 168                                                             | 174 | 220 |
| <i>T. succinifaciens</i> DSM 2489          | RNEIIVRHGKGDQRHVMIPTLICEKSHIENLRKIHEEDLKA-GFGSVKLPQALSDKY       |     |     |
| <i>T. denticola</i> ATCC 35405             | KNEITVHCCKGAKDRKTVLPSLKFPLQKHMEKVRRIHEADCKE-GFGSVLPFPALAKKY     |     |     |
| <i>T. vincentii</i> ATCC 35580             | KNEITVHCCKGAKDRKTVLPSLKFPLQKHLENVRRRIHEADCKE-GFGSVLPFPALAKKY    |     |     |
| <i>T. brennaborensis</i> DSM 12168         | HNMIIRNGKGAQRDRRTPMLPHILEKKIRAHIVSVKQLHQADIAD-GWGVVTLFPALRKKY   |     |     |
| <i>V. cholerae</i> M66-2                   | YGAIRINQGGKGNRTVTLAKELYPHLKEQIALAKRYDRDLHQKNYGGVWLPALKEKY       |     |     |
| <i>V. parahaemolyticus</i> RIMD 2210633    | YGAVRVWQGGKGNRTVTLAKELHEPLKSOMNLARNYFQDRHVPYAGVYI SEGLRRKY      |     |     |
| <i>V. fischeri</i> MJ11                    | HKTITIRNGKGNKDRRTVLPDSIIEPELKTQLAFVQKHMDAIN-GDVEVLPALATAKKY     |     |     |
| <i>V. vulnificus</i> CMCP6                 | YGALRVWQGGKGNRTVTLAKELYPLLKEQEAALARYYQKDRITAGYAGVWLSSSLQRKY     |     |     |
| <i>V. splendidus</i> LGP32                 | YKSVRVWQGGKGNRTVITAPELFPAIKLQQKSAEYQQDIDHKAFSGVYLPDLSLAKKY      |     |     |
| <i>P. haloplanktis</i> TAC125              | YNCIRIWDGKGGKNRVVTLAVELTPQLRSQIQLVDSYLQDLKNPLYSGAYMPHLLRKKY     |     |     |
| <i>P. alcaligenes</i> ATCC 55044           | RLEILIRDGKGGKDRVTMLPRKLAAPLELHLQVRALHEQDLRE-GYGRANLPHALARKY     |     |     |
| <i>P. stutzeri</i> A1501                   | RHEILIRDGKGGKDRVTMLPRSLVQPLRRHLAVVKAIDHDSEREQ-GRGDVWLPFALARKY   |     |     |
| <i>S. denitrificans</i> OS217              | TKSIFVYRGGKQKDRVCMPLNGLIDVLKSQMKQVKKLHEADLSD-GFGLASLPTSLIRKY    |     |     |
| <i>Shewanella</i> MR-7                     | RASLSVRDGGKGNKDRVTMLPSLRFKALQKREERALLVHVADLAA-GAGRVLPALARKY     |     |     |
| <i>S. oneidensis</i> MR-1                  | SASLTVRDGKGGKDRVTMLPSLRFKALQKREERALLVHVADLAA-GAGRVLPALARKY      |     |     |
| <i>S. degradans</i> 2-40                   | NECLMIRESKGKWRRTLLPKSLIEPLTYRDIALARHKADLAD-GYGSVYLPALNVKY       |     |     |
| <i>X. campestris</i> pv. <i>begoniae</i>   | RGEMLVRDGKGGKDRRVPPLPHSLRKAQKREERALLVHVADLAA-GAGRVLPALARKY      |     |     |
| <i>X. campestris</i> pv. <i>campestris</i> | RCEIVVRDGGKGNKDRRVPPLPRSLRGELMQQRERALLVHVADLAA-GAGRVLPALARKY    |     |     |
| <i>N. europaea</i> ATCC 19718              | RGEILIRDGKGGKDRVTMLPELSPVLPQTYLLQRRVLFDDDLRL-GKASVYLPDALRKY     |     |     |
| <i>Azoarcus</i> ebN1                       | RREIIVREGKGNKDRVTMLPASLVDLDRDHLQARRVHIDRDLST-GHADVELPHAIERKY    |     |     |
| <i>G. metallireducens</i> GS-15            | RSEIIVREGKGNKDRITMLPQAVAAPLREHLGRVEALHGADLRA-GFGEVHLPALGKKY     |     |     |
| <i>R. gelatinosus</i> IL144                | QRAIVVRAGKGGKDRVVTLPATLEAPLREQLRAVHAVWAEDSAA-GHAGVQLPDPLEKVV    |     |     |
| <i>R. baltica</i> SH1                      | NKQIEIRQSKGNKSRVLPMPDDLIEPLRRFVKTRDALHEHDLAN-GTASVYLPALDRKY     |     |     |
| <i>K. stuttgartiensis</i>                  | RNEILVRDGGKGNKDRITMLPELLKPLQDHLRKKVKAIEHKDLAE-GWGRVQMPDALDRKY   |     |     |
| <i>B. marina</i> DSM 3645                  | RSEITIVREGKGNKDRVTMPRAVVSLSQEHQRVKLVHEQDVAD-GYGRAELPHALARKY     |     |     |
| <i>C. phaeobacteroides</i> DSM 266         | SNEILVRDGGKGNKDRITMLPELSPVLPQTYLLQRRVLFDDDLRL-GKASVYLPDALRKY    |     |     |
| <i>C. phaeobacteroides</i> BS1             | RGFLTIVRSKGNKDRVTMLFPPKNLAEPLRNHLSIIRNIHEEDRRN-GIEGVSMPLGALAYKY |     |     |
| <i>Synechococcus</i> sp.                   | ARQLTVRSKGNKDRVTMLPSTVVEPVQAYLLAVREIHRADLAA-GWGRVMLPLALGRKY     |     |     |
| <i>S. ruber</i> DSM 13855                  | TSRLHVWDGKGGTDRITVLPERLHGPLRRHLKTVKAQHEADCAD-GVGGVYLPDAIAEKY    |     |     |

|                                            | 229      | 242           | 250         | 277          | 280           |
|--------------------------------------------|----------|---------------|-------------|--------------|---------------|
| <i>T. succinifaciens</i> DSM 2489          | QGSKEFFW | QWLFPPQKNRWKN | QOTGEEGRWHL | DESIMQRAVKQA | ILEAGINKNAS   |
| <i>T. denticola</i> ATCC 35405             | PNASKAWA | QWVFPQARRWRN  | KETGEQGRHH  | IDPSVIQRTL   | HEAVLRSGIPKPI |
| <i>T. vincentii</i> ATCC 35580             | PNAGKTWA | QWVFPQARRWQNK | ETGEQGRHH   | IDPSVIQRTL   | HEAVLRSGIPKPI |
| <i>T. brennaborense</i> DSM 12168          | SGASADFA | QWVFPQKNRWKN  | TDTGQMGGRYH | IDASIMERAVQ  | KAVRDAGIYKRG  |
| <i>V. cholerae</i> M66-2                   | PNAPYEFW | HYLFFPSFQLSL  | DESVMRRHH   | MNETVLQKAV   | RRSAQEAIEKTV  |
| <i>V. parahaemolyticus</i> RIMD 2210633    | PNALDFNW | HFLFSPNKLSD   | KETGQLRRHH  | INESAIQRAV   | KRSALDANIEKT  |
| <i>V. fischeri</i> MJ11                    | PHRAKSYG | QWVFPQKQSKD   | FRSGQRRHH   | MDRSVQKQ     | VNTNAIKKLEID  |
| <i>V. vulnificus</i> CMCP6                 | QGAEMDFN | HYLFFPSDRLSR  | DESDLLRRHH  | INEQALQRAV   | KRAAKDAGITKS  |
| <i>V. splendidus</i> LGP32                 | PSAERSLN | WQFLFPSARLAP  | LRTGELRRHH  | IHPALQKH     | IKVASQKADIEKN |
| <i>P. haloplanktis</i> TAC125              | PNHNRLQW | QYLFSSHKLSD   | ESKQLRRHH   | IDKQLQRAV    | KKAFFDAHINKHV |
| <i>P. alcaligenes</i> ATCC 55044           | PNAAAEGW | QWVFPVNRSED   | FRSGGIFRHH  | LHEKTIQRAV   | RNAVRRVGLH    |
| <i>P. stutzeri</i> A1501                   | PKAPKEGW | QWVFPASGLSD   | FRSGVRRHH   | LDEKRIQRAF   | KRAVRGASIVK   |
| <i>S. denitrificans</i> OS217              | RSNASKFH | WQYIFPASRR    | CMHESDNYVCR | HHIHPATAF    | SRALRQATPNC   |
| <i>Shewanella</i> MR-7                     | PNAFRQHG | WMTIFPSTT     | CINETYGT    | LCRHHLH      | QSVIRKALG     |
| <i>S. oneidensis</i> MR-1                  | PNAFRQHG | WMTIFPSTT     | CINETYGT    | LCRHHLH      | QSVIRKALG     |
| <i>S. degradans</i> 2-40                   | PNASKEPA | WQYMFPAHLS    | TDERSGVLR   | RHHMGEQ      | SVQRVVKIAL    |
| <i>X. campestris</i> pv. <i>begoniae</i>   | PNADVEPW | QYLFPSARRSR   | FRSGRPGRHH  | VSEELQRAV    | Q SARQQAGIVK  |
| <i>X. campestris</i> pv. <i>campestris</i> | PSADVEPW | QYLFPGARRS    | VDERSGRVGL  | HHVSEELR     | QRAVHAARRR    |
| <i>N. europaea</i> ATCC 19718              | PNAAATDW | WQYIFPSSG     | SFSDERSV    | RRHHIDEK     | LLQRAMKKA     |
| <i>Azoarcus</i> ebN1                       | EQAGRQWA | WQYIFFAAKS    | YSTDEFTG    | IYRHHV       | GEWVIQ        |
| <i>G. metallireducens</i> GS-15            | PNAGREGW | QWVFPQKQSL    | TDERTGVTR   | RHHADEK      | GIQRAIRQAV    |
| <i>R. gelatinosus</i> IL144                | PRAGSSWA | WVFPQGGH      | SVDFRSVVR   | RHHVLP       | GTQAFARAL     |
| <i>R. baltica</i> SH1                      | PSAHELKQ | WYLFASHRL     | SRDERTGRI   | HRHHLR       | ATFFPTRLR     |
| <i>K. stuttgartiensis</i>                  | PNAPADWR | QWVFPQENR     | WKNTKTTE    | EGRHH        | MDESIMQRT     |
| <i>B. marina</i> DSM 3645                  | PNANQEWQ | WVFPQERR      | WRNSRTRE    | QGRHH        | IDESLFRS      |
| <i>C. phaeobacteroides</i> DSM 266         | PNAPAEWR | QWVFPQEH      | RWKNAKT     | GEGRHH       | MDESILQ       |
| <i>C. phaeobacteroides</i> BS1             | PNAGKEGW | WVFPASANL     | SADVNTN     | IRHHM        | YPTTVQ        |
| <i>Synechococcus</i> sp.                   | PTAASEWA | WVFPQARW      | HDRNRT      | EGRHH        | IDPSLIQ       |
| <i>S. ruber</i> DSM 13855                  | PTAKTEWR | QWVFPSTT      | LSDEFRS     | GAVRR        | HRSDSAVQ      |

|                                            | 303           | 312          |
|--------------------------------------------|---------------|--------------|
| <i>T. succinifaciens</i> DSM 2489          | HSFATHLLENGYD | IRTIQELLGHSD |
| <i>T. denticola</i> ATCC 35405             | HSFATHLLEAGYD | IRTIQELLGHSD |
| <i>T. vincentii</i> ATCC 35580             | HSFATHLLESGYD | IRTIQELLGHSD |
| <i>T. brennaborense</i> DSM 12168          | HSFATHLLENGYD | IRTIQELLGHSD |
| <i>V. cholerae</i> M66-2                   | HSFATHLLEVGAD | IRTIQELLGHSD |
| <i>V. parahaemolyticus</i> RIMD 2210633    | HSFATHLLESGAD | IRTIQELLGHSD |
| <i>V. fischeri</i> MJ11                    | HSFATHLLESGAD | IRTIQELLGHSD |
| <i>V. vulnificus</i> CMCP6                 | HSFATHLLESGAD | IRTIQELLGHSD |
| <i>V. splendidus</i> LGP32                 | HSFATHLLESGAD | IRTIQELLGHSD |
| <i>P. haloplanktis</i> TAC125              | HSFATHLLESGAD | IRTIQELLGHSD |
| <i>P. alcaligenes</i> ATCC 55044           | HSFATHLLESGAD | IRTIQELLGHSD |
| <i>P. stutzeri</i> A1501                   | HSFATHLLESGAD | IRTIQELLGHSD |
| <i>S. denitrificans</i> OS217              | HSFATHLLESGAD | IRTIQELLGHSD |
| <i>Shewanella</i> MR-7                     | HSFATHLLESGAD | IRTIQELLGHSD |
| <i>S. oneidensis</i> MR-1                  | HSFATHLLESGAD | IRTIQELLGHSD |
| <i>S. degradans</i> 2-40                   | HSFATHLLESGAD | IRTIQELLGHSD |
| <i>X. campestris</i> pv. <i>begoniae</i>   | HSFATHLLESGAD | IRTIQELLGHSD |
| <i>X. campestris</i> pv. <i>campestris</i> | HSFATHLLESGAD | IRTIQELLGHSD |
| <i>N. europaea</i> ATCC 19718              | HSFATHLLESGAD | IRTIQELLGHSD |
| <i>Azoarcus</i> ebN1                       | HSFATHLLESGAD | IRTIQELLGHSD |
| <i>G. metallireducens</i> GS-15            | HSFATHLLESGAD | IRTIQELLGHSD |
| <i>R. gelatinosus</i> IL144                | HSFATHLLESGAD | IRTIQELLGHSD |
| <i>R. baltica</i> SH1                      | HSFATHLLESGAD | IRTIQELLGHSD |
| <i>K. stuttgartiensis</i>                  | HSFATHLLESGAD | IRTIQELLGHSD |
| <i>B. marina</i> DSM 3645                  | HSFATHLLESGAD | IRTIQELLGHSD |
| <i>C. phaeobacteroides</i> DSM 266         | HSFATHLLESGAD | IRTIQELLGHSD |
| <i>C. phaeobacteroides</i> BS1             | HSFATHLLESGAD | IRTIQELLGHSD |
| <i>Synechococcus</i> sp.                   | HSFATHLLESGAD | IRTIQELLGHSD |
| <i>S. ruber</i> DSM 13855                  | HSFATHLLESGAD | IRTIQELLGHSD |

- Active-site residue
- Residues stabilizing the EHB T
- Catalytic tyrosine
- Residues stabilizing the essential EHB G
- D161 residue

**Supplementary Figure 1.** Multiple alignment of predicted integron integrases from *Treponema* species. The columns corresponding to functionally important sites—including active sites, the catalytic tyrosine, the D161 residue that is important for synapse formation, and residues important for stabilizing the unpaired T and unpaired G—are highlighted in the figure. These sites are marked in [1].

## Integron end position

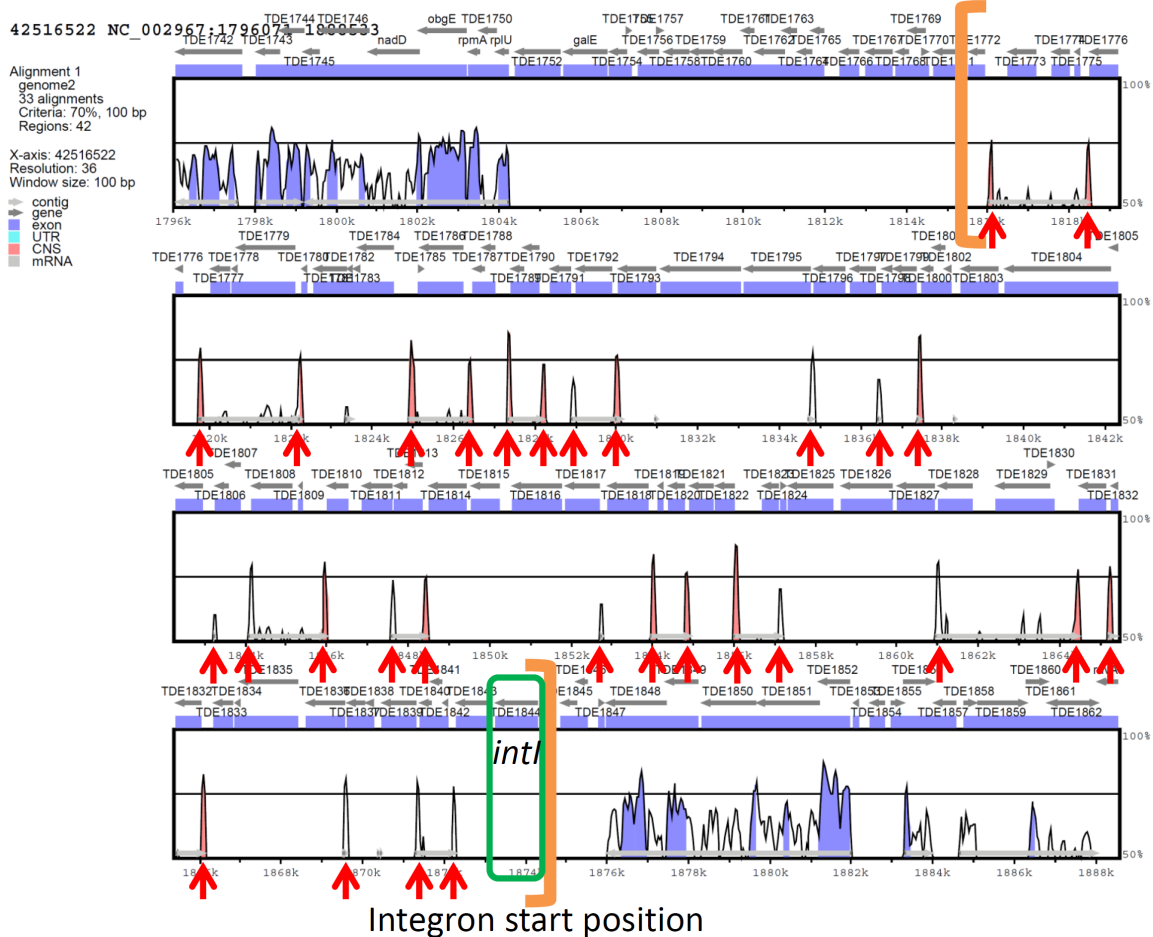

**Supplementary Figure 2.** Mapping of the *Treponema phagedenis* integron locus to the *Treponema denticola* ATCC 35405 genome. The plot was generated using the wgVista [2] web service, which shows the mapping between the *T. denticola* genome (1,796,071-1,888,533 bp) and all homologous *T. phagedenis* contigs. Regions between these two genomes with sequence similarity are shown as curves in the plots. Higher curves indicate more similarities in the corresponding regions. The integron boundaries are marked by large square brackets, with the location of integron integrase in the *T. denticola* genome highlighted with a green box. The lack of a *T. phagedenis* *intl* gene can be observed by the lack of conservation (curves) within the green box. The spikes represent *attC* integron recombination sites (noted by red arrowheads) discovered in the *Treponema phagedenis* genome, which are syntenic to the *attC* sites in the *Treponema denticola* genome (while the gene cassettes between the *attC* sites are not conserved between these two genomes). Note that the integron in the *T. denticola* genome is on the reverse-complement strand, so we have marked the start and end positions accordingly.

**Supplementary Table 1.** Species used in the construction of the phylogenetic tree.

| Species                           | Strain                       | Accession                         |
|-----------------------------------|------------------------------|-----------------------------------|
| <i>Treponema denticola</i>        | ATCC 35405                   | NC_002967                         |
|                                   | F0402                        | Broad institute <sup>1</sup>      |
|                                   | ATCC 35404                   | Broad institute <sup>1</sup>      |
|                                   | ATCC 33520                   | Broad institute <sup>1</sup>      |
|                                   | ATCC 33521                   | Broad institute <sup>1</sup>      |
|                                   | AL-2                         | Broad institute <sup>1</sup>      |
|                                   | ASLM                         | Broad institute <sup>1</sup>      |
|                                   | H1-T                         | Broad institute <sup>1</sup>      |
|                                   | H-22                         | Broad institute <sup>1</sup>      |
|                                   | MYR-T                        | Broad institute <sup>1</sup>      |
|                                   | OTK                          | Broad institute <sup>1</sup>      |
|                                   | SP33                         | Broad institute <sup>1</sup>      |
|                                   | SP37                         | Broad institute <sup>1</sup>      |
| US-Trep                           | Broad institute <sup>1</sup> |                                   |
| <i>Treponema vincentii</i>        | ATCC 35580                   | HMP reference genome <sup>2</sup> |
| <i>Treponema phagedenis</i>       | F0421                        | HMP reference genome <sup>2</sup> |
| <i>Treponema pallidum</i>         | SS14                         | NC_010741                         |
| <i>Treponema brennaborensense</i> | DSM 12168                    | NC_015500                         |
| <i>Treponema succinifaciens</i>   | DSM 2489                     | NC_015385                         |
| <i>Treponema azotonutricium</i>   | ZAS-9                        | NC_015577                         |
| <i>Treponema primitia</i>         | ZAS-2                        | NC_015578                         |
| <i>Spirochaeta coccoides</i>      | DSM 17374                    | NC_015436                         |
| <i>Spirochaete thermophile</i>    | DSM 6192                     | NC_014484                         |
| <i>Borrelia burgdorferi</i>       | B31                          | NC_001318                         |
| <i>Brachyspira murdochii</i>      | DSM 12563                    | NC_014150                         |

|                                 |                      |                     |
|---------------------------------|----------------------|---------------------|
| <i>Leptospira interrogans</i>   | Lai str. 56601       | NC_004342           |
| <i>Xanthomonas campestris</i>   | campestris str. 8004 | NC_007086           |
| <i>Pseudomonas stutzeri</i>     | A1501                | NC_009434           |
| <i>Shewanella denitrificans</i> | OS217                | NC_007954           |
| <i>Vibrio cholerae</i>          | M66-2                | NC_012578           |
| <i>Blastopirellula marina</i>   | DSM 3645             | AANZ000000000       |
| <i>Candidatus Kuenenia</i>      |                      | CT030148, CT573074, |
| <i>Chlorobium</i>               | DSM 266              | NC_008639           |
| <i>Chlorobium</i>               | BS1                  | NC_010831           |
| <i>Synechococcus</i>            | sp.                  | AANO00000000.1      |
| <i>Salinibacter ruber</i>       | DSM 13855            | NC_007677           |

---

<sup>1</sup>: *Treponema denticola* F0402 Sequencing Project, Broad Institute of Harvard and MIT (<http://www.broadinstitute.org/>). <sup>2</sup>: <http://hmpdacc.org/>.

**Supplementary Table 2.** Sequences of the eight representative *T. denticola* *attC* sites.

| ID             | Sequence                                                                   |
|----------------|----------------------------------------------------------------------------|
| <b>denti1*</b> | GTCTAACTTCCGCTTAACCTGCATTGCCGCAAAGGCAATGTCAGGTTGAA<br>GCGGGTGTTAGGCAA      |
| <b>denti2</b>  | GCCTAACATGCACTTAAGGTGCAACTGGGCTGAAGCCCAGTTGTCAGCT<br>TGAAGTGCTTGTTAGAGG    |
| denti3         | CGTACAGGCGTTTAACCGGCCGATCTTCAGAGCGGGTTTTGTCAGTCTT<br>GAACTGCGTGTTAGAC      |
| <b>denti4</b>  | TTCTAACATTCGCCTAATCTGCAAACGGGCATGGTCCCTTTTGTGTCAGCGT<br>TGAAGTGGGCGTTAGGTA |
| denti5         | CGCAGGCGACCGTCCAAGCAACTTTCGTGACAAAACAAATGTCAGGTTG<br>AAGCGGGTGTTAGACG      |
| denti6         | CATATAGGCACATTAAGCAAGTTTTATGACAAAACAAATGTCAGCGTTGG<br>AGCGGGCGTTAGGTT      |
| <b>denti7</b>  | GTCTAACATTCGCTTAACCTGCATTTGCGGCTTGTCCGCAATGTCAGGTT<br>GAAGCGGGTGTTAGAT     |
| <b>denti8</b>  | ATCTAACTACCGCTTAACCTGCAACAAGGCTTGTCTTGTGTCAGCGTT<br>GAAGCGGGTGTTAGAACT     |

\*: Only five *attC* sites (denti1, denti2, denti4, denti7 and denti8) are included in the alignment shown in Figure 3.

**Supplementary Table 3.** The locations of integron *attC* recombination sites detected in the draft genomes of 13 *Treponema denticola* strains.

| Strain name | Contig id    | Start position | End position |
|-------------|--------------|----------------|--------------|
| al-2        | AGDQ01000001 | 115            | 175          |
| al-2        | AGDQ01000001 | 2503           | 2563         |
| al-2        | AGDQ01000001 | 3384           | 3434         |
| al-2        | AGDQ01000001 | 4476           | 4528         |
| al-2        | AGDQ01000001 | 5025           | 5059         |
| al-2        | AGDQ01000001 | 5898           | 5960         |
| al-2        | AGDQ01000004 | 206226         | 206279       |
| al-2        | AGDQ01000004 | 293740         | 293784       |
| al-2        | AGDQ01000005 | 70962          | 71022        |
| al-2        | AGDQ01000006 | 52061          | 52124        |
| al-2        | AGDQ01000007 | 201            | 254          |
| al-2        | AGDQ01000007 | 7464           | 7526         |
| al-2        | AGDQ01000007 | 8428           | 8474         |
| al-2        | AGDQ01000007 | 9798           | 9838         |
| al-2        | AGDQ01000007 | 45013          | 45067        |
| al-2        | AGDQ01000007 | 46703          | 46764        |
| al-2        | AGDQ01000007 | 119081         | 119129       |
| al-2        | AGDQ01000015 | 33             | 95           |
| al-2        | AGDQ01000015 | 770            | 820          |
| al-2        | AGDQ01000015 | 1697           | 1759         |
| al-2        | AGDQ01000015 | 2444           | 2508         |
| al-2        | AGDQ01000015 | 3561           | 3623         |
| al-2        | AGDQ01000015 | 4682           | 4743         |
| al-2        | AGDQ01000016 | 115            | 169          |
| al-2        | AGDQ01000016 | 2079           | 2138         |
| al-2        | AGDQ01000016 | 2961           | 3022         |
| al-2        | AGDQ01000017 | 1              | 55           |
| al-2        | AGDQ01000017 | 832            | 885          |
| al-2        | AGDQ01000018 | 110            | 168          |
| al-2        | AGDQ01000018 | 2349           | 2412         |
| al-2        | AGDQ01000018 | 5754           | 5817         |
| al-2        | AGDQ01000018 | 6612           | 6674         |
| al-2        | AGDQ01000018 | 7989           | 8050         |
| al-2        | AGDQ01000018 | 8902           | 8956         |
| al-2        | AGDQ01000018 | 10592          | 10655        |
| aslm        | AGDR01000001 | 1487           | 1545         |
| aslm        | AGDR01000001 | 3651           | 3712         |



---

|            |              |        |        |
|------------|--------------|--------|--------|
| aslm       | AGDR01000006 | 2478   | 2536   |
| aslm       | AGDR01000021 | 147006 | 147059 |
| aslm       | AGDR01000021 | 220234 | 220279 |
| aslm       | AGDR01000025 | 42318  | 42359  |
| aslm       | AGDR01000026 | 91     | 152    |
| aslm       | AGDR01000026 | 1181   | 1243   |
| aslm       | AGDR01000026 | 7875   | 7936   |
| aslm       | AGDR01000026 | 9180   | 9242   |
| aslm       | AGDR01000026 | 10951  | 10986  |
| aslm       | AGDR01000031 | 137    | 173    |
| aslm       | AGDR01000041 | 18780  | 18840  |
| aslm       | AGDR01000041 | 19636  | 19698  |
| aslm       | AGDR01000041 | 20599  | 20654  |
| aslm       | AGDR01000041 | 20617  | 20654  |
| aslm       | AGDR01000041 | 21439  | 21501  |
| aslm       | AGDR01000041 | 22296  | 22357  |
| aslm       | AGDR01000041 | 24589  | 24642  |
| aslm       | AGDR01000041 | 25995  | 26056  |
| aslm       | AGDR01000041 | 26832  | 26890  |
| aslm       | AGDR01000041 | 27809  | 27871  |
| aslm       | AGDR01000041 | 31017  | 31067  |
| aslm       | AGDR01000041 | 31954  | 32005  |
| aslm       | AGDR01000041 | 32804  | 32864  |
| aslm       | AGDR01000041 | 33687  | 33747  |
| aslm       | AGDR01000041 | 34547  | 34610  |
| aslm       | AGDR01000041 | 35687  | 35745  |
| aslm       | AGDR01000041 | 36627  | 36680  |
| aslm       | AGDR01000041 | 39233  | 39296  |
| aslm       | AGDR01000041 | 40163  | 40221  |
| aslm       | AGDR01000041 | 43062  | 43125  |
| aslm       | AGDR01000042 | 478    | 511    |
| aslm       | AGDR01000042 | 1800   | 1858   |
| aslm       | AGDR01000042 | 2777   | 2840   |
| aslm       | AGDR01000042 | 3707   | 3765   |
| aslm       | AGDR01000042 | 6606   | 6669   |
| atcc_33520 | AGDS01000003 | 75985  | 76034  |
| atcc_33520 | AGDS01000006 | 24102  | 24138  |
| atcc_33520 | AGDS01000006 | 25874  | 25927  |
| atcc_33520 | AGDS01000006 | 33859  | 33921  |
| atcc_33520 | AGDS01000006 | 34825  | 34871  |
| atcc_33520 | AGDS01000006 | 36195  | 36235  |
| atcc_33520 | AGDS01000006 | 83093  | 83155  |
| atcc_33520 | AGDS01000006 | 228423 | 228483 |

---

---

|            |              |        |        |
|------------|--------------|--------|--------|
| atcc_33520 | AGDS01000012 | 22773  | 22837  |
| atcc_33520 | AGDS01000012 | 23663  | 23724  |
| atcc_33520 | AGDS01000012 | 25628  | 25691  |
| atcc_33520 | AGDS01000012 | 26366  | 26425  |
| atcc_33520 | AGDS01000012 | 27346  | 27393  |
| atcc_33520 | AGDS01000012 | 28861  | 28922  |
| atcc_33520 | AGDS01000012 | 30671  | 30725  |
| atcc_33520 | AGDS01000012 | 32549  | 32611  |
| atcc_33520 | AGDS01000012 | 33507  | 33569  |
| atcc_33520 | AGDS01000012 | 34364  | 34428  |
| atcc_33520 | AGDS01000012 | 35443  | 35503  |
| atcc_33520 | AGDS01000012 | 36402  | 36463  |
| atcc_33520 | AGDS01000012 | 37684  | 37745  |
| atcc_33520 | AGDS01000012 | 38628  | 38673  |
| atcc_33520 | AGDS01000012 | 39520  | 39580  |
| atcc_33520 | AGDS01000012 | 40337  | 40398  |
| atcc_33520 | AGDS01000012 | 41270  | 41327  |
| atcc_33520 | AGDS01000012 | 42576  | 42637  |
| atcc_33520 | AGDS01000012 | 44046  | 44105  |
| atcc_33520 | AGDS01000023 | 41485  | 41536  |
| atcc_33520 | AGDS01000023 | 41502  | 41536  |
| atcc_33520 | AGDS01000023 | 179558 | 179617 |
| atcc_33520 | AGDS01000023 | 181828 | 181872 |
| atcc_33521 | AGDT01000004 | 57281  | 57317  |
| atcc_33521 | AGDT01000004 | 59053  | 59113  |
| atcc_33521 | AGDT01000005 | 143    | 207    |
| atcc_33521 | AGDT01000005 | 1678   | 1743   |
| atcc_33521 | AGDT01000005 | 2500   | 2561   |
| atcc_33521 | AGDT01000005 | 3857   | 3918   |
| atcc_33521 | AGDT01000005 | 3857   | 3893   |
| atcc_33521 | AGDT01000005 | 113500 | 113548 |
| atcc_33521 | AGDT01000005 | 185418 | 185478 |
| atcc_33521 | AGDT01000005 | 328413 | 328448 |
| atcc_33521 | AGDT01000014 | 33     | 95     |
| atcc_33521 | AGDT01000014 | 1014   | 1074   |
| atcc_33521 | AGDT01000015 | 31     | 93     |
| atcc_33521 | AGDT01000015 | 958    | 1012   |
| atcc_33521 | AGDT01000016 | 32     | 95     |
| atcc_33521 | AGDT01000016 | 1060   | 1123   |
| atcc_33521 | AGDT01000016 | 3532   | 3594   |
| atcc_33521 | AGDT01000016 | 4841   | 4894   |
| atcc_33521 | AGDT01000016 | 5929   | 5995   |
| atcc_33521 | AGDT01000016 | 7243   | 7305   |

---

---

|            |              |        |        |
|------------|--------------|--------|--------|
| atcc_33521 | AGDT01000016 | 7802   | 7836   |
| atcc_33521 | AGDT01000016 | 8682   | 8734   |
| atcc_33521 | AGDT01000022 | 48796  | 48848  |
| atcc_33521 | AGDT01000022 | 134126 | 134170 |
| atcc_33521 | AGDT01000022 | 134137 | 134170 |
| atcc_33521 | AGDT01000024 | 3      | 65     |
| atcc_33521 | AGDT01000024 | 894    | 956    |
| atcc_33521 | AGDT01000024 | 1789   | 1851   |
| atcc_33521 | AGDT01000025 | 839    | 901    |
| atcc_33521 | AGDT01000025 | 1730   | 1792   |
| atcc_35404 | AGDU01000005 | 10240  | 10292  |
| atcc_35404 | AGDU01000005 | 11138  | 11172  |
| atcc_35404 | AGDU01000005 | 11669  | 11731  |
| atcc_35404 | AGDU01000005 | 12979  | 13045  |
| atcc_35404 | AGDU01000005 | 14080  | 14133  |
| atcc_35404 | AGDU01000005 | 15380  | 15442  |
| atcc_35404 | AGDU01000005 | 17851  | 17914  |
| atcc_35404 | AGDU01000005 | 18879  | 18942  |
| atcc_35404 | AGDU01000006 | 85     | 149    |
| atcc_35404 | AGDU01000006 | 1014   | 1076   |
| atcc_35404 | AGDU01000007 | 10     | 70     |
| atcc_35404 | AGDU01000007 | 989    | 1051   |
| atcc_35404 | AGDU01000018 | 46541  | 46576  |
| atcc_35404 | AGDU01000019 | 70363  | 70423  |
| atcc_35404 | AGDU01000020 | 24038  | 24086  |
| atcc_35404 | AGDU01000020 | 133668 | 133729 |
| atcc_35404 | AGDU01000020 | 135025 | 135086 |
| atcc_35404 | AGDU01000020 | 135843 | 135908 |
| atcc_35404 | AGDU01000020 | 137379 | 137443 |
| atcc_35404 | AGDU01000021 | 899    | 961    |
| atcc_35404 | AGDU01000021 | 7807   | 7867   |
| atcc_35404 | AGDU01000021 | 9576   | 9611   |
| atcc_35404 | AGDU01000021 | 9603   | 9639   |
| atcc_35404 | AGDU01000028 | 146161 | 146205 |
| atcc_35404 | AGDU01000029 | 32663  | 32715  |
| f0402      | ADEC01000007 | 119032 | 119086 |
| f0402      | ADEC01000008 | 315    | 368    |
| f0402      | ADEC01000008 | 7574   | 7636   |
| f0402      | ADEC01000009 | 301    | 342    |
| f0402      | ADEC01000011 | 8983   | 9038   |
| f0402      | ADEC01000011 | 10010  | 10043  |
| f0402      | ADEC01000011 | 83039  | 83094  |
| f0402      | ADEC01000011 | 154397 | 154457 |

---

---

|       |              |        |        |
|-------|--------------|--------|--------|
| f0402 | ADEC01000014 | 580903 | 580964 |
| f0402 | ADEC01000014 | 583062 | 583125 |
| f0402 | ADEC01000014 | 584026 | 584081 |
| f0402 | ADEC01000014 | 584867 | 584932 |
| f0402 | ADEC01000014 | 585848 | 585895 |
| f0402 | ADEC01000014 | 587050 | 587104 |
| f0402 | ADEC01000014 | 588410 | 588458 |
| f0402 | ADEC01000014 | 589854 | 589918 |
| f0402 | ADEC01000014 | 590582 | 590644 |
| f0402 | ADEC01000014 | 594428 | 594491 |
| f0402 | ADEC01000014 | 596873 | 596932 |
| f0402 | ADEC01000014 | 597489 | 597548 |
| f0402 | ADEC01000014 | 598293 | 598345 |
| f0402 | ADEC01000014 | 599131 | 599192 |
| f0402 | ADEC01000014 | 604072 | 604133 |
| f0402 | ADEC01000014 | 605106 | 605168 |
| f0402 | ADEC01000014 | 607073 | 607131 |
| f0402 | ADEC01000014 | 608253 | 608312 |
| f0402 | ADEC01000014 | 609318 | 609379 |
| f0402 | ADEC01000014 | 611291 | 611349 |
| f0402 | ADEC01000014 | 612186 | 612248 |
| f0402 | ADEC01000014 | 613053 | 613108 |
| f0402 | ADEC01000014 | 613848 | 613909 |
| f0402 | ADEC01000014 | 617020 | 617081 |
| f0402 | ADEC01000016 | 11042  | 11086  |
| f0402 | ADEC01000019 | 11902  | 11954  |
| h1-t  | AGDW01000001 | 211303 | 211347 |
| h1-t  | AGDW01000005 | 74616  | 74665  |
| h1-t  | AGDW01000009 | 21155  | 21191  |
| h1-t  | AGDW01000009 | 22927  | 22989  |
| h1-t  | AGDW01000009 | 24233  | 24293  |
| h1-t  | AGDW01000009 | 31069  | 31130  |
| h1-t  | AGDW01000009 | 32438  | 32478  |
| h1-t  | AGDW01000011 | 15258  | 15319  |
| h1-t  | AGDW01000011 | 17200  | 17262  |
| h1-t  | AGDW01000011 | 94695  | 94749  |
| h1-t  | AGDW01000011 | 163166 | 163226 |
| h1-t  | AGDW01000016 | 22141  | 22204  |
| h1-t  | AGDW01000016 | 23108  | 23154  |
| h1-t  | AGDW01000016 | 24198  | 24259  |
| h1-t  | AGDW01000017 | 35     | 95     |
| h1-t  | AGDW01000018 | 803    | 862    |
| h1-t  | AGDW01000018 | 1783   | 1830   |

---

---

|      |              |        |        |
|------|--------------|--------|--------|
| h1-t | AGDW01000018 | 3677   | 3731   |
| h1-t | AGDW01000018 | 5555   | 5617   |
| h1-t | AGDW01000018 | 6513   | 6575   |
| h1-t | AGDW01000018 | 7370   | 7434   |
| h1-t | AGDW01000018 | 8449   | 8509   |
| h1-t | AGDW01000019 | 1235   | 1296   |
| h1-t | AGDW01000019 | 2179   | 2224   |
| h1-t | AGDW01000019 | 3071   | 3131   |
| h1-t | AGDW01000019 | 3888   | 3949   |
| h1-t | AGDW01000019 | 4821   | 4878   |
| h1-t | AGDW01000019 | 6127   | 6188   |
| h1-t | AGDW01000019 | 7597   | 7656   |
| h-22 | AGDV01000004 | 49590  | 49651  |
| h-22 | AGDV01000004 | 50490  | 50524  |
| h-22 | AGDV01000004 | 51021  | 51073  |
| h-22 | AGDV01000004 | 52122  | 52174  |
| h-22 | AGDV01000004 | 53179  | 53242  |
| h-22 | AGDV01000004 | 54897  | 54960  |
| h-22 | AGDV01000004 | 58101  | 58149  |
| h-22 | AGDV01000004 | 59617  | 59672  |
| h-22 | AGDV01000004 | 61868  | 61931  |
| h-22 | AGDV01000004 | 62757  | 62820  |
| h-22 | AGDV01000004 | 63630  | 63692  |
| h-22 | AGDV01000004 | 65498  | 65561  |
| h-22 | AGDV01000004 | 66553  | 66617  |
| h-22 | AGDV01000004 | 67440  | 67502  |
| h-22 | AGDV01000004 | 68435  | 68487  |
| h-22 | AGDV01000005 | 591    | 652    |
| h-22 | AGDV01000005 | 4756   | 4818   |
| h-22 | AGDV01000005 | 5828   | 5891   |
| h-22 | AGDV01000005 | 7227   | 7288   |
| h-22 | AGDV01000005 | 9226   | 9277   |
| h-22 | AGDV01000005 | 10078  | 10135  |
| h-22 | AGDV01000005 | 11207  | 11268  |
| h-22 | AGDV01000005 | 12069  | 12129  |
| h-22 | AGDV01000005 | 12944  | 13005  |
| h-22 | AGDV01000005 | 14572  | 14635  |
| h-22 | AGDV01000005 | 16562  | 16626  |
| h-22 | AGDV01000005 | 18771  | 18832  |
| h-22 | AGDV01000010 | 220611 | 220648 |
| h-22 | AGDV01000012 | 165828 | 165888 |
| h-22 | AGDV01000012 | 306374 | 306435 |
| h-22 | AGDV01000012 | 360477 | 360517 |

---

---

|       |              |        |        |
|-------|--------------|--------|--------|
| h-22  | AGDV01000012 | 362078 | 362139 |
| h-22  | AGDV01000013 | 837    | 900    |
| h-22  | AGDV01000014 | 8125   | 8165   |
| h-22  | AGDV01000020 | 149928 | 149972 |
| h-22  | AGDV01000020 | 238595 | 238647 |
| myr-t | AGDX01000003 | 21181  | 21216  |
| myr-t | AGDX01000003 | 22925  | 22987  |
| myr-t | AGDX01000003 | 24231  | 24291  |
| myr-t | AGDX01000003 | 31067  | 31128  |
| myr-t | AGDX01000003 | 32436  | 32476  |
| myr-t | AGDX01000003 | 84065  | 84126  |
| myr-t | AGDX01000003 | 86007  | 86069  |
| myr-t | AGDX01000003 | 163502 | 163556 |
| myr-t | AGDX01000003 | 231973 | 232033 |
| myr-t | AGDX01000006 | 606028 | 606091 |
| myr-t | AGDX01000006 | 606995 | 607041 |
| myr-t | AGDX01000006 | 608085 | 608146 |
| myr-t | AGDX01000006 | 609368 | 609428 |
| myr-t | AGDX01000007 | 34     | 95     |
| myr-t | AGDX01000007 | 1317   | 1377   |
| myr-t | AGDX01000007 | 3281   | 3344   |
| myr-t | AGDX01000008 | 464    | 523    |
| myr-t | AGDX01000008 | 1444   | 1491   |
| myr-t | AGDX01000008 | 3338   | 3392   |
| myr-t | AGDX01000008 | 5216   | 5278   |
| myr-t | AGDX01000008 | 6174   | 6236   |
| myr-t | AGDX01000008 | 7031   | 7095   |
| myr-t | AGDX01000008 | 8110   | 8170   |
| myr-t | AGDX01000008 | 9069   | 9130   |
| myr-t | AGDX01000008 | 10352  | 10413  |
| myr-t | AGDX01000008 | 11296  | 11341  |
| myr-t | AGDX01000008 | 12188  | 12248  |
| myr-t | AGDX01000008 | 13005  | 13066  |
| myr-t | AGDX01000008 | 13938  | 13995  |
| myr-t | AGDX01000008 | 15244  | 15305  |
| myr-t | AGDX01000008 | 16714  | 16773  |
| myr-t | AGDX01000020 | 28746  | 28790  |
| myr-t | AGDX01000021 | 76112  | 76161  |
| otk   | AGDY01000001 | 199949 | 200010 |
| otk   | AGDY01000001 | 200862 | 200921 |
| otk   | AGDY01000001 | 205424 | 205486 |
| otk   | AGDY01000001 | 210157 | 210206 |
| otk   | AGDY01000001 | 211739 | 211792 |

---

---

|      |              |        |        |
|------|--------------|--------|--------|
| otk  | AGDY01000001 | 212457 | 212515 |
| otk  | AGDY01000001 | 214534 | 214598 |
| otk  | AGDY01000001 | 215424 | 215489 |
| otk  | AGDY01000001 | 217701 | 217750 |
| otk  | AGDY01000002 | 13     | 75     |
| otk  | AGDY01000002 | 1094   | 1156   |
| otk  | AGDY01000002 | 2722   | 2767   |
| otk  | AGDY01000002 | 3650   | 3710   |
| otk  | AGDY01000002 | 5891   | 5949   |
| otk  | AGDY01000002 | 6868   | 6929   |
| otk  | AGDY01000002 | 8310   | 8371   |
| otk  | AGDY01000002 | 9208   | 9262   |
| otk  | AGDY01000002 | 10238  | 10303  |
| otk  | AGDY01000002 | 11179  | 11242  |
| otk  | AGDY01000002 | 12031  | 12092  |
| otk  | AGDY01000002 | 12892  | 12943  |
| otk  | AGDY01000002 | 14264  | 14326  |
| otk  | AGDY01000002 | 14881  | 14941  |
| otk  | AGDY01000002 | 15681  | 15742  |
| otk  | AGDY01000002 | 17777  | 17827  |
| otk  | AGDY01000004 | 321728 | 321779 |
| otk  | AGDY01000005 | 16593  | 16628  |
| otk  | AGDY01000005 | 17393  | 17454  |
| otk  | AGDY01000005 | 20437  | 20500  |
| otk  | AGDY01000006 | 122202 | 122250 |
| otk  | AGDY01000006 | 192107 | 192169 |
| otk  | AGDY01000006 | 192854 | 192917 |
| otk  | AGDY01000006 | 193781 | 193845 |
| otk  | AGDY01000006 | 249055 | 249097 |
| otk  | AGDY01000006 | 249971 | 250031 |
| otk  | AGDY01000006 | 251728 | 251790 |
| otk  | AGDY01000007 | 50     | 113    |
| otk  | AGDY01000007 | 6969   | 7029   |
| otk  | AGDY01000007 | 7802   | 7865   |
| otk  | AGDY01000009 | 223272 | 223324 |
| otk  | AGDY01000010 | 134487 | 134523 |
| sp33 | AGDZ01000005 | 36527  | 36579  |
| sp33 | AGDZ01000009 | 15898  | 15936  |
| sp33 | AGDZ01000010 | 254    | 303    |
| sp33 | AGDZ01000010 | 1061   | 1111   |
| sp33 | AGDZ01000011 | 239    | 293    |
| sp33 | AGDZ01000014 | 51618  | 51665  |
| sp33 | AGDZ01000014 | 53283  | 53316  |

---

---

|      |              |        |        |
|------|--------------|--------|--------|
| sp33 | AGDZ01000018 | 871    | 923    |
| sp33 | AGDZ01000018 | 81934  | 81986  |
| sp33 | AGDZ01000018 | 85363  | 85423  |
| sp33 | AGDZ01000018 | 86437  | 86481  |
| sp33 | AGDZ01000018 | 136920 | 136957 |
| sp33 | AGDZ01000018 | 144973 | 145009 |
| sp33 | AGDZ01000028 | 91847  | 91887  |
| sp33 | AGDZ01000028 | 505302 | 505336 |
| sp33 | AGDZ01000029 | 221    | 283    |
| sp33 | AGDZ01000029 | 1648   | 1710   |
| sp33 | AGDZ01000029 | 2511   | 2569   |
| sp33 | AGDZ01000029 | 4627   | 4688   |
| sp33 | AGDZ01000029 | 5529   | 5584   |
| sp33 | AGDZ01000030 | 573    | 632    |
| sp33 | AGDZ01000030 | 1462   | 1509   |
| sp33 | AGDZ01000031 | 44     | 104    |
| sp33 | AGDZ01000031 | 3134   | 3195   |
| sp33 | AGDZ01000032 | 2      | 51     |
| sp33 | AGDZ01000032 | 717    | 780    |
| sp33 | AGDZ01000032 | 3177   | 3239   |
| sp33 | AGDZ01000033 | 73     | 135    |
| sp33 | AGDZ01000033 | 1053   | 1116   |
| sp33 | AGDZ01000034 | 1      | 35     |
| sp33 | AGDZ01000034 | 1622   | 1682   |
| sp33 | AGDZ01000034 | 3742   | 3805   |
| sp33 | AGDZ01000034 | 4846   | 4910   |
| sp33 | AGDZ01000035 | 1032   | 1095   |
| sp33 | AGDZ01000035 | 2366   | 2427   |
| sp33 | AGDZ01000036 | 813    | 874    |
| sp33 | AGDZ01000036 | 1778   | 1839   |
| sp33 | AGDZ01000036 | 2560   | 2615   |
| sp33 | AGDZ01000036 | 3657   | 3719   |
| sp33 | AGDZ01000036 | 4490   | 4540   |
| sp33 | AGDZ01000036 | 5285   | 5349   |
| sp33 | AGDZ01000037 | 1088   | 1150   |
| sp33 | AGDZ01000037 | 2058   | 2122   |
| sp33 | AGDZ01000037 | 3061   | 3116   |
| sp37 | AGEA01000002 | 286010 | 286061 |
| sp37 | AGEA01000004 | 163647 | 163682 |
| sp37 | AGEA01000004 | 164447 | 164508 |
| sp37 | AGEA01000004 | 167723 | 167785 |
| sp37 | AGEA01000005 | 77430  | 77483  |
| sp37 | AGEA01000006 | 22018  | 22070  |

---



---

|         |              |        |        |
|---------|--------------|--------|--------|
| sp37    | AGEA01000006 | 96113  | 96175  |
| sp37    | AGEA01000006 | 96860  | 96923  |
| sp37    | AGEA01000006 | 97788  | 97851  |
| sp37    | AGEA01000006 | 145389 | 145430 |
| sp37    | AGEA01000006 | 146305 | 146365 |
| sp37    | AGEA01000006 | 148062 | 148122 |
| sp37    | AGEA01000006 | 149504 | 149565 |
| sp37    | AGEA01000007 | 713    | 777    |
| sp37    | AGEA01000007 | 1587   | 1652   |
| sp37    | AGEA01000007 | 2515   | 2566   |
| sp37    | AGEA01000007 | 3873   | 3925   |
| sp37    | AGEA01000007 | 10798  | 10852  |
| sp37    | AGEA01000007 | 11625  | 11688  |
| sp37    | AGEA01000013 | 171034 | 171086 |
| sp37    | AGEA01000019 | 50827  | 50878  |
| sp37    | AGEA01000020 | 1800   | 1862   |
| sp37    | AGEA01000021 | 4020   | 4069   |
| sp37    | AGEA01000021 | 5603   | 5656   |
| sp37    | AGEA01000021 | 6321   | 6379   |
| sp37    | AGEA01000021 | 8398   | 8462   |
| sp37    | AGEA01000021 | 9288   | 9353   |
| sp37    | AGEA01000021 | 11565  | 11614  |
| sp37    | AGEA01000021 | 12509  | 12571  |
| sp37    | AGEA01000021 | 13590  | 13652  |
| sp37    | AGEA01000021 | 15218  | 15263  |
| sp37    | AGEA01000021 | 16146  | 16206  |
| sp37    | AGEA01000021 | 18387  | 18445  |
| sp37    | AGEA01000021 | 18410  | 18445  |
| sp37    | AGEA01000021 | 19364  | 19424  |
| sp37    | AGEA01000021 | 20806  | 20867  |
| sp37    | AGEA01000021 | 21657  | 21711  |
| sp37    | AGEA01000022 | 1      | 55     |
| sp37    | AGEA01000022 | 844    | 905    |
| sp37    | AGEA01000022 | 1705   | 1756   |
| sp37    | AGEA01000022 | 3077   | 3139   |
| sp37    | AGEA01000023 | 389    | 449    |
| sp37    | AGEA01000023 | 1189   | 1250   |
| sp37    | AGEA01000023 | 3285   | 3335   |
| us-trep | AGEB01000001 | 146963 | 147016 |
| us-trep | AGEB01000001 | 220191 | 220236 |
| us-trep | AGEB01000002 | 65598  | 65639  |
| us-trep | AGEB01000002 | 66938  | 67000  |
| us-trep | AGEB01000002 | 73633  | 73694  |

---

---

|         |              |       |       |
|---------|--------------|-------|-------|
| us-trep | AGEB01000002 | 74938 | 75000 |
| us-trep | AGEB01000002 | 76709 | 76744 |
| us-trep | AGEB01000004 | 28701 | 28737 |
| us-trep | AGEB01000011 | 32023 | 32083 |
| us-trep | AGEB01000011 | 32879 | 32941 |
| us-trep | AGEB01000011 | 33842 | 33897 |
| us-trep | AGEB01000011 | 34682 | 34744 |
| us-trep | AGEB01000011 | 35539 | 35600 |
| us-trep | AGEB01000011 | 37832 | 37885 |
| us-trep | AGEB01000011 | 39238 | 39299 |
| us-trep | AGEB01000011 | 40075 | 40133 |
| us-trep | AGEB01000011 | 41052 | 41114 |
| us-trep | AGEB01000011 | 44260 | 44310 |
| us-trep | AGEB01000011 | 45197 | 45248 |
| us-trep | AGEB01000011 | 46047 | 46107 |
| us-trep | AGEB01000011 | 46930 | 46990 |
| us-trep | AGEB01000011 | 47790 | 47853 |
| us-trep | AGEB01000011 | 48930 | 48988 |
| us-trep | AGEB01000011 | 49870 | 49923 |
| us-trep | AGEB01000011 | 52476 | 52539 |
| us-trep | AGEB01000012 | 91    | 152   |
| us-trep | AGEB01000012 | 1181  | 1243  |
| us-trep | AGEB01000012 | 2259  | 2292  |
| us-trep | AGEB01000013 | 186   | 244   |
| us-trep | AGEB01000013 | 3085  | 3148  |
| us-trep | AGEB01000014 | 310   | 368   |
| us-trep | AGEB01000014 | 2474  | 2535  |
| us-trep | AGEB01000014 | 2501  | 2538  |
| us-trep | AGEB01000017 | 38758 | 38816 |

---

**Supplementary Table 4.** Integron genes detected in the draft genomes of 13 *Treponema denticola* strains.

| Strain name | Contig id    | Start position | End position | Sense/Antisense |
|-------------|--------------|----------------|--------------|-----------------|
| al-2        | AGDQ01000001 | 2567           | 2719         | +               |
| al-2        | AGDQ01000001 | 2869           | 3363         | +               |
| al-2        | AGDQ01000001 | 3520           | 3879         | +               |
| al-2        | AGDQ01000001 | 3897           | 4160         | +               |
| al-2        | AGDQ01000001 | 4344           | 4451         | +               |
| al-2        | AGDQ01000001 | 5112           | 5891         | +               |
| al-2        | AGDQ01000007 | 7876           | 8163         | +               |
| al-2        | AGDQ01000007 | 8174           | 8413         | +               |
| al-2        | AGDQ01000007 | 8922           | 9179         | +               |
| al-2        | AGDQ01000007 | 45104          | 45919        | +               |
| al-2        | AGDQ01000007 | 45992          | 46699        | +               |
| al-2        | AGDQ01000015 | 856            | 1686         | +               |
| al-2        | AGDQ01000015 | 2989           | 3378         | +               |
| al-2        | AGDQ01000015 | 3733           | 4608         | +               |
| al-2        | AGDQ01000016 | 345            | 1370         | +               |
| al-2        | AGDQ01000016 | 1529           | 2020         | +               |
| al-2        | AGDQ01000017 | 116            | 430          | +               |
| al-2        | AGDQ01000017 | 445            | 828          | +               |
| al-2        | AGDQ01000018 | 295            | 669          | +               |
| al-2        | AGDQ01000018 | 767            | 1387         | +               |
| al-2        | AGDQ01000018 | 1492           | 2337         | +               |
| al-2        | AGDQ01000018 | 2687           | 4108         | +               |
| al-2        | AGDQ01000018 | 4128           | 5669         | +               |
| al-2        | AGDQ01000018 | 7421           | 7666         | +               |
| al-2        | AGDQ01000018 | 7801           | 7986         | +               |
| al-2        | AGDQ01000018 | 8098           | 8895         | +               |
| aslm        | AGDR01000001 | 2278           | 2709         | -               |
| aslm        | AGDR01000001 | 2745           | 3158         | -               |
| aslm        | AGDR01000001 | 3290           | 3478         | -               |
| aslm        | AGDR01000026 | 183            | 251          | -               |
| aslm        | AGDR01000026 | 335            | 724          | -               |
| aslm        | AGDR01000026 | 7949           | 9127         | -               |
| aslm        | AGDR01000026 | 9631           | 9912         | -               |
| aslm        | AGDR01000026 | 9938           | 10912        | -               |
| aslm        | AGDR01000041 | 19080          | 19301        | -               |
| aslm        | AGDR01000041 | 19425          | 19598        | -               |
| aslm        | AGDR01000041 | 19701          | 20021        | -               |

---

|            |              |       |       |   |
|------------|--------------|-------|-------|---|
| aslm       | AGDR01000041 | 20660 | 21079 | - |
| aslm       | AGDR01000041 | 21086 | 21283 | - |
| aslm       | AGDR01000041 | 22367 | 23023 | - |
| aslm       | AGDR01000041 | 23110 | 23655 | - |
| aslm       | AGDR01000041 | 23664 | 24551 | - |
| aslm       | AGDR01000041 | 26180 | 26563 | - |
| aslm       | AGDR01000041 | 27878 | 28816 | - |
| aslm       | AGDR01000041 | 28893 | 29534 | - |
| aslm       | AGDR01000041 | 29561 | 30991 | - |
| aslm       | AGDR01000041 | 31068 | 31910 | - |
| aslm       | AGDR01000041 | 32018 | 32512 | - |
| aslm       | AGDR01000041 | 35822 | 36067 | - |
| aslm       | AGDR01000041 | 36155 | 36508 | - |
| aslm       | AGDR01000041 | 37729 | 39210 | - |
| aslm       | AGDR01000041 | 39296 | 39535 | - |
| aslm       | AGDR01000041 | 39540 | 39857 | - |
| aslm       | AGDR01000041 | 40252 | 42984 | - |
| aslm       | AGDR01000042 | 666   | 1607  | - |
| atcc_33520 | AGDS01000006 | 24204 | 25178 | + |
| atcc_33520 | AGDS01000006 | 25204 | 25485 | + |
| atcc_33520 | AGDS01000006 | 34273 | 34560 | + |
| atcc_33520 | AGDS01000006 | 34571 | 34810 | + |
| atcc_33520 | AGDS01000006 | 35286 | 35576 | + |
| atcc_33520 | AGDS01000012 | 23894 | 24919 | + |
| atcc_33520 | AGDS01000012 | 25077 | 25568 | + |
| atcc_33520 | AGDS01000012 | 26530 | 26940 | + |
| atcc_33520 | AGDS01000012 | 27190 | 27309 | + |
| atcc_33520 | AGDS01000012 | 27539 | 28624 | + |
| atcc_33520 | AGDS01000012 | 28953 | 30614 | + |
| atcc_33520 | AGDS01000012 | 30746 | 31417 | + |
| atcc_33520 | AGDS01000012 | 31604 | 32542 | + |
| atcc_33520 | AGDS01000012 | 33600 | 34241 | + |
| atcc_33520 | AGDS01000012 | 34538 | 35404 | + |
| atcc_33520 | AGDS01000012 | 35598 | 36296 | + |
| atcc_33520 | AGDS01000012 | 36553 | 36723 | + |
| atcc_33520 | AGDS01000012 | 37031 | 37129 | + |
| atcc_33520 | AGDS01000012 | 37197 | 37280 | + |
| atcc_33520 | AGDS01000012 | 38782 | 39171 | + |
| atcc_33520 | AGDS01000012 | 39335 | 39415 | + |
| atcc_33520 | AGDS01000012 | 39662 | 40048 | + |
| atcc_33520 | AGDS01000012 | 40056 | 40331 | + |
| atcc_33520 | AGDS01000012 | 40426 | 40617 | + |
| atcc_33520 | AGDS01000012 | 40665 | 41255 | + |

---

---

|            |              |        |        |   |
|------------|--------------|--------|--------|---|
| atcc_33520 | AGDS01000012 | 41478  | 42170  | + |
| atcc_33520 | AGDS01000012 | 42179  | 42265  | + |
| atcc_33520 | AGDS01000012 | 42762  | 43136  | + |
| atcc_33520 | AGDS01000012 | 43228  | 43548  | + |
| atcc_33520 | AGDS01000012 | 43938  | 44039  | + |
| atcc_33520 | AGDS01000023 | 179625 | 181148 | - |
| atcc_33520 | AGDS01000023 | 181181 | 181810 | - |
| atcc_33521 | AGDT01000004 | 57383  | 58357  | + |
| atcc_33521 | AGDT01000004 | 58383  | 58664  | + |
| atcc_33521 | AGDT01000005 | 338    | 1558   | + |
| atcc_33521 | AGDT01000005 | 1825   | 2211   | + |
| atcc_33521 | AGDT01000005 | 2219   | 2494   | + |
| atcc_33521 | AGDT01000005 | 2742   | 2831   | + |
| atcc_33521 | AGDT01000005 | 2973   | 3239   | + |
| atcc_33521 | AGDT01000015 | 121    | 951    | + |
| atcc_33521 | AGDT01000016 | 125    | 1054   | + |
| atcc_33521 | AGDT01000016 | 1251   | 2666   | + |
| atcc_33521 | AGDT01000016 | 2854   | 3291   | + |
| atcc_33521 | AGDT01000016 | 3307   | 3471   | + |
| atcc_33521 | AGDT01000016 | 3705   | 3857   | - |
| atcc_33521 | AGDT01000016 | 3979   | 4833   | + |
| atcc_33521 | AGDT01000016 | 5358   | 5747   | + |
| atcc_33521 | AGDT01000016 | 6146   | 6838   | + |
| atcc_33521 | AGDT01000016 | 6847   | 6975   | + |
| atcc_33521 | AGDT01000016 | 7889   | 8668   | + |
| atcc_33521 | AGDT01000024 | 78     | 230    | - |
| atcc_33521 | AGDT01000025 | 1180   | 1470   | + |
| atcc_35404 | AGDU01000005 | 10306  | 11085  | - |
| atcc_35404 | AGDU01000005 | 11999  | 12127  | - |
| atcc_35404 | AGDU01000005 | 12136  | 12828  | - |
| atcc_35404 | AGDU01000005 | 13227  | 13616  | - |
| atcc_35404 | AGDU01000005 | 14141  | 14995  | - |
| atcc_35404 | AGDU01000005 | 15053  | 15280  | - |
| atcc_35404 | AGDU01000005 | 15503  | 15667  | - |
| atcc_35404 | AGDU01000005 | 15683  | 16120  | - |
| atcc_35404 | AGDU01000005 | 16308  | 17723  | - |
| atcc_35404 | AGDU01000005 | 17920  | 18849  | - |
| atcc_35404 | AGDU01000006 | 156    | 986    | - |
| atcc_35404 | AGDU01000020 | 134347 | 134613 | - |
| atcc_35404 | AGDU01000020 | 134755 | 134844 | - |
| atcc_35404 | AGDU01000020 | 135092 | 135367 | - |
| atcc_35404 | AGDU01000020 | 135375 | 135761 | - |
| atcc_35404 | AGDU01000020 | 136028 | 137248 | - |

---

|            |              |        |        |   |
|------------|--------------|--------|--------|---|
| atcc_35404 | AGDU01000021 | 8256   | 8537   | - |
| atcc_35404 | AGDU01000021 | 8563   | 9537   | - |
| f0402      | ADEC01000014 | 583128 | 583490 | - |
| f0402      | ADEC01000014 | 584087 | 584506 | - |
| f0402      | ADEC01000014 | 584513 | 584710 | - |
| f0402      | ADEC01000014 | 584932 | 585171 | - |
| f0402      | ADEC01000014 | 585176 | 585508 | - |
| f0402      | ADEC01000014 | 587172 | 588017 | - |
| f0402      | ADEC01000014 | 588094 | 588201 | - |
| f0402      | ADEC01000014 | 588567 | 589814 | - |
| f0402      | ADEC01000014 | 594570 | 595826 | - |
| f0402      | ADEC01000014 | 597039 | 597413 | - |
| f0402      | ADEC01000014 | 597896 | 598285 | - |
| f0402      | ADEC01000014 | 598348 | 598806 | - |
| f0402      | ADEC01000014 | 604410 | 605066 | - |
| f0402      | ADEC01000014 | 605228 | 605719 | - |
| f0402      | ADEC01000014 | 605878 | 606903 | - |
| f0402      | ADEC01000014 | 607138 | 607557 | - |
| f0402      | ADEC01000014 | 607565 | 607762 | - |
| f0402      | ADEC01000014 | 607787 | 608212 | - |
| f0402      | ADEC01000014 | 609417 | 609806 | - |
| f0402      | ADEC01000014 | 610040 | 611224 | - |
| f0402      | ADEC01000014 | 611362 | 611601 | - |
| f0402      | ADEC01000014 | 611612 | 611899 | - |
| f0402      | ADEC01000014 | 612259 | 612753 | - |
| h1-t       | AGDW01000009 | 21257  | 22231  | + |
| h1-t       | AGDW01000009 | 22257  | 22538  | + |
| h1-t       | AGDW01000009 | 23042  | 24220  | + |
| h1-t       | AGDW01000009 | 31529  | 31819  | + |
| h1-t       | AGDW01000011 | 16769  | 17017  | + |
| h1-t       | AGDW01000011 | 17054  | 17140  | + |
| h1-t       | AGDW01000016 | 22556  | 22843  | + |
| h1-t       | AGDW01000016 | 22854  | 23093  | + |
| h1-t       | AGDW01000016 | 23311  | 23445  | + |
| h1-t       | AGDW01000016 | 23626  | 24015  | + |
| h1-t       | AGDW01000018 | 967    | 1377   | + |
| h1-t       | AGDW01000018 | 1884   | 3620   | + |
| h1-t       | AGDW01000018 | 3800   | 4423   | + |
| h1-t       | AGDW01000018 | 4610   | 5548   | + |
| h1-t       | AGDW01000018 | 6588   | 7247   | + |
| h1-t       | AGDW01000018 | 7544   | 8410   | + |
| h1-t       | AGDW01000019 | 2333   | 2722   | + |
| h1-t       | AGDW01000019 | 3213   | 3599   | + |

---

|      |              |       |       |   |
|------|--------------|-------|-------|---|
| h1-t | AGDW01000019 | 3607  | 3882  | + |
| h1-t | AGDW01000019 | 3977  | 4168  | + |
| h1-t | AGDW01000019 | 4216  | 4806  | + |
| h1-t | AGDW01000019 | 5029  | 5721  | + |
| h1-t | AGDW01000019 | 6313  | 6687  | + |
| h1-t | AGDW01000019 | 6779  | 7099  | + |
| h1-t | AGDW01000019 | 7489  | 7590  | + |
| h-22 | AGDV01000004 | 49658 | 50437 | - |
| h-22 | AGDV01000004 | 51389 | 51652 | - |
| h-22 | AGDV01000004 | 51670 | 52029 | - |
| h-22 | AGDV01000004 | 52188 | 52445 | - |
| h-22 | AGDV01000004 | 52487 | 52696 | - |
| h-22 | AGDV01000004 | 54346 | 54861 | - |
| h-22 | AGDV01000004 | 58258 | 59505 | - |
| h-22 | AGDV01000004 | 59682 | 61838 | - |
| h-22 | AGDV01000004 | 61931 | 62170 | - |
| h-22 | AGDV01000004 | 62175 | 62507 | - |
| h-22 | AGDV01000004 | 62829 | 63578 | - |
| h-22 | AGDV01000004 | 63699 | 64490 | - |
| h-22 | AGDV01000004 | 64578 | 64895 | - |
| h-22 | AGDV01000004 | 65065 | 65457 | - |
| h-22 | AGDV01000004 | 65563 | 66495 | - |
| h-22 | AGDV01000004 | 66630 | 66869 | - |
| h-22 | AGDV01000004 | 66880 | 67167 | - |
| h-22 | AGDV01000004 | 67512 | 67676 | - |
| h-22 | AGDV01000004 | 67780 | 68136 | - |
| h-22 | AGDV01000005 | 662   | 1492  | - |
| h-22 | AGDV01000005 | 1578  | 3221  | - |
| h-22 | AGDV01000005 | 3386  | 4756  | - |
| h-22 | AGDV01000005 | 5895  | 6740  | - |
| h-22 | AGDV01000005 | 6745  | 7170  | - |
| h-22 | AGDV01000005 | 7436  | 8137  | - |
| h-22 | AGDV01000005 | 8243  | 9196  | - |
| h-22 | AGDV01000005 | 9282  | 9956  | - |
| h-22 | AGDV01000005 | 10186 | 10461 | - |
| h-22 | AGDV01000005 | 10482 | 11171 | - |
| h-22 | AGDV01000005 | 12712 | 12906 | - |
| h-22 | AGDV01000005 | 13010 | 13969 | - |
| h-22 | AGDV01000005 | 14140 | 14523 | - |
| h-22 | AGDV01000005 | 14695 | 15186 | - |
| h-22 | AGDV01000005 | 15344 | 16369 | - |
| h-22 | AGDV01000005 | 16732 | 18012 | - |
| h-22 | AGDV01000005 | 18314 | 18454 | - |

---

---

|       |              |        |        |   |
|-------|--------------|--------|--------|---|
| h-22  | AGDV01000012 | 361135 | 361425 | - |
| h-22  | AGDV01000012 | 361799 | 361987 | - |
| myr-t | AGDX01000003 | 21255  | 22229  | + |
| myr-t | AGDX01000003 | 22255  | 22536  | + |
| myr-t | AGDX01000003 | 23040  | 24218  | + |
| myr-t | AGDX01000003 | 31527  | 31817  | + |
| myr-t | AGDX01000003 | 85576  | 85824  | + |
| myr-t | AGDX01000003 | 85861  | 85947  | + |
| myr-t | AGDX01000006 | 606443 | 606730 | + |
| myr-t | AGDX01000006 | 606741 | 606980 | + |
| myr-t | AGDX01000006 | 607198 | 607332 | + |
| myr-t | AGDX01000006 | 607513 | 607902 | + |
| myr-t | AGDX01000006 | 608236 | 608469 | + |
| myr-t | AGDX01000006 | 608794 | 608964 | + |
| myr-t | AGDX01000007 | 1547   | 2572   | + |
| myr-t | AGDX01000007 | 2730   | 3221   | + |
| myr-t | AGDX01000008 | 628    | 1038   | + |
| myr-t | AGDX01000008 | 1288   | 1407   | + |
| myr-t | AGDX01000008 | 1545   | 3281   | + |
| myr-t | AGDX01000008 | 3413   | 4084   | + |
| myr-t | AGDX01000008 | 4271   | 5209   | + |
| myr-t | AGDX01000008 | 6267   | 6908   | + |
| myr-t | AGDX01000008 | 7205   | 8071   | + |
| myr-t | AGDX01000008 | 8265   | 8963   | + |
| myr-t | AGDX01000008 | 9699   | 9797   | + |
| myr-t | AGDX01000008 | 11450  | 11839  | + |
| myr-t | AGDX01000008 | 12003  | 12083  | + |
| myr-t | AGDX01000008 | 12330  | 12716  | + |
| myr-t | AGDX01000008 | 12724  | 12999  | + |
| myr-t | AGDX01000008 | 13094  | 13285  | + |
| myr-t | AGDX01000008 | 13333  | 13923  | + |
| myr-t | AGDX01000008 | 14146  | 14838  | + |
| myr-t | AGDX01000008 | 14847  | 14933  | + |
| myr-t | AGDX01000008 | 15430  | 15804  | + |
| myr-t | AGDX01000008 | 15896  | 16216  | + |
| myr-t | AGDX01000008 | 16606  | 16707  | + |
| otk   | AGDY01000001 | 210293 | 210703 | - |
| otk   | AGDY01000001 | 210906 | 211697 | - |
| otk   | AGDY01000001 | 213248 | 214129 | - |
| otk   | AGDY01000001 | 214261 | 214449 | - |
| otk   | AGDY01000001 | 214598 | 214837 | - |
| otk   | AGDY01000001 | 214842 | 215174 | - |
| otk   | AGDY01000001 | 215493 | 217688 | - |

---



---

|      |              |        |        |   |
|------|--------------|--------|--------|---|
| otk  | AGDY01000002 | 135    | 221    | - |
| otk  | AGDY01000002 | 260    | 649    | - |
| otk  | AGDY01000002 | 818    | 952    | - |
| otk  | AGDY01000002 | 3724   | 5436   | - |
| otk  | AGDY01000002 | 5525   | 5761   | - |
| otk  | AGDY01000002 | 7126   | 7401   | - |
| otk  | AGDY01000002 | 7653   | 8255   | - |
| otk  | AGDY01000002 | 8990   | 9163   | - |
| otk  | AGDY01000002 | 9293   | 9565   | - |
| otk  | AGDY01000002 | 9664   | 9879   | - |
| otk  | AGDY01000002 | 10374  | 10625  | - |
| otk  | AGDY01000002 | 10711  | 11067  | - |
| otk  | AGDY01000002 | 11248  | 11667  | - |
| otk  | AGDY01000002 | 11675  | 11875  | - |
| otk  | AGDY01000002 | 12105  | 12599  | - |
| otk  | AGDY01000002 | 12950  | 13522  | - |
| otk  | AGDY01000002 | 13572  | 13862  | - |
| otk  | AGDY01000002 | 14433  | 14843  | - |
| otk  | AGDY01000002 | 14945  | 15661  | - |
| otk  | AGDY01000002 | 15742  | 16452  | - |
| otk  | AGDY01000002 | 16545  | 17735  | - |
| otk  | AGDY01000005 | 16815  | 17147  | + |
| otk  | AGDY01000006 | 192180 | 192815 | - |
| otk  | AGDY01000006 | 192924 | 193754 | - |
| otk  | AGDY01000006 | 249209 | 249292 | - |
| otk  | AGDY01000006 | 249360 | 249632 | - |
| otk  | AGDY01000007 | 7418   | 7699   | - |
| sp33 | AGDZ01000010 | 552    | 854    | + |
| sp33 | AGDZ01000010 | 931    | 1053   | + |
| sp33 | AGDZ01000018 | 85429  | 85767  | - |
| sp33 | AGDZ01000018 | 85982  | 86143  | - |
| sp33 | AGDZ01000029 | 291    | 1610   | - |
| sp33 | AGDZ01000029 | 2574   | 3176   | - |
| sp33 | AGDZ01000029 | 3262   | 3612   | - |
| sp33 | AGDZ01000029 | 3704   | 4594   | - |
| sp33 | AGDZ01000029 | 4836   | 5078   | - |
| sp33 | AGDZ01000029 | 5189   | 5491   | - |
| sp33 | AGDZ01000032 | 922    | 2886   | - |
| sp33 | AGDZ01000034 | 39     | 746    | - |
| sp33 | AGDZ01000034 | 1167   | 1622   | - |
| sp33 | AGDZ01000034 | 2368   | 3708   | - |
| sp33 | AGDZ01000034 | 3879   | 4712   | - |
| sp33 | AGDZ01000035 | 1098   | 1418   | - |

---

---

|      |              |        |        |   |
|------|--------------|--------|--------|---|
| sp33 | AGDZ01000035 | 1760   | 2329   | - |
| sp33 | AGDZ01000036 | 888    | 1040   | - |
| sp33 | AGDZ01000036 | 1142   | 1420   | - |
| sp33 | AGDZ01000036 | 1844   | 2518   | - |
| sp33 | AGDZ01000036 | 3728   | 4444   | - |
| sp33 | AGDZ01000036 | 4548   | 5078   | - |
| sp33 | AGDZ01000037 | 1252   | 1950   | - |
| sp33 | AGDZ01000037 | 2129   | 2926   | - |
| sp37 | AGEA01000004 | 163869 | 164201 | + |
| sp37 | AGEA01000004 | 164206 | 164445 | + |
| sp37 | AGEA01000006 | 96186  | 96821  | - |
| sp37 | AGEA01000006 | 96930  | 97760  | - |
| sp37 | AGEA01000006 | 145543 | 145626 | - |
| sp37 | AGEA01000006 | 145694 | 145966 | - |
| sp37 | AGEA01000006 | 148320 | 148595 | - |
| sp37 | AGEA01000006 | 148847 | 149449 | - |
| sp37 | AGEA01000007 | 786    | 1535   | - |
| sp37 | AGEA01000007 | 1659   | 2471   | - |
| sp37 | AGEA01000007 | 2575   | 2850   | - |
| sp37 | AGEA01000007 | 2980   | 3201   | - |
| sp37 | AGEA01000007 | 3412   | 3687   | - |
| sp37 | AGEA01000007 | 11241  | 11480  | - |
| sp37 | AGEA01000021 | 4156   | 4440   | - |
| sp37 | AGEA01000021 | 4770   | 5561   | - |
| sp37 | AGEA01000021 | 7112   | 7993   | - |
| sp37 | AGEA01000021 | 8125   | 8313   | - |
| sp37 | AGEA01000021 | 8706   | 9023   | - |
| sp37 | AGEA01000021 | 9357   | 11552  | - |
| sp37 | AGEA01000021 | 11619  | 11981  | - |
| sp37 | AGEA01000021 | 12756  | 13145  | - |
| sp37 | AGEA01000021 | 13314  | 13448  | - |
| sp37 | AGEA01000021 | 16220  | 17932  | - |
| sp37 | AGEA01000021 | 18021  | 18257  | - |
| sp37 | AGEA01000021 | 20884  | 21279  | - |
| sp37 | AGEA01000021 | 21439  | 21612  | - |
| sp37 | AGEA01000021 | 21742  | 22014  | - |
| sp37 | AGEA01000021 | 22113  | 22328  | - |
| sp37 | AGEA01000022 | 61     | 480    | - |
| sp37 | AGEA01000022 | 488    | 688    | - |
| sp37 | AGEA01000022 | 918    | 1412   | - |
| sp37 | AGEA01000022 | 1763   | 2317   | - |
| sp37 | AGEA01000022 | 2620   | 2895   | - |
| sp37 | AGEA01000023 | 453    | 1169   | - |

---

---

|         |              |       |       |   |
|---------|--------------|-------|-------|---|
| sp37    | AGEA01000023 | 1250  | 1960  | - |
| sp37    | AGEA01000023 | 2053  | 3243  | - |
| us-trep | AGEB01000002 | 66257 | 66547 | - |
| us-trep | AGEB01000002 | 66705 | 66854 | + |
| us-trep | AGEB01000002 | 73707 | 74885 | - |
| us-trep | AGEB01000002 | 75389 | 75670 | - |
| us-trep | AGEB01000002 | 75696 | 76670 | - |
| us-trep | AGEB01000011 | 32177 | 32302 | - |
| us-trep | AGEB01000011 | 32323 | 32544 | - |
| us-trep | AGEB01000011 | 32668 | 32841 | - |
| us-trep | AGEB01000011 | 32944 | 33132 | - |
| us-trep | AGEB01000011 | 33264 | 33509 | - |
| us-trep | AGEB01000011 | 33903 | 34322 | - |
| us-trep | AGEB01000011 | 34329 | 34526 | - |
| us-trep | AGEB01000011 | 35610 | 36266 | - |
| us-trep | AGEB01000011 | 36353 | 36898 | - |
| us-trep | AGEB01000011 | 36907 | 37794 | - |
| us-trep | AGEB01000011 | 39423 | 39806 | - |
| us-trep | AGEB01000011 | 41121 | 42059 | - |
| us-trep | AGEB01000011 | 42136 | 42777 | - |
| us-trep | AGEB01000011 | 42804 | 44234 | - |
| us-trep | AGEB01000011 | 44311 | 45153 | - |
| us-trep | AGEB01000011 | 45261 | 45755 | - |
| us-trep | AGEB01000011 | 49065 | 49310 | - |
| us-trep | AGEB01000011 | 49398 | 49751 | - |
| us-trep | AGEB01000011 | 50972 | 52453 | - |
| us-trep | AGEB01000012 | 183   | 251   | - |
| us-trep | AGEB01000012 | 335   | 724   | - |
| us-trep | AGEB01000012 | 1257  | 1409  | - |
| us-trep | AGEB01000012 | 1511  | 1789  | - |
| us-trep | AGEB01000013 | 275   | 3007  | - |
| us-trep | AGEB01000014 | 1101  | 1532  | - |
| us-trep | AGEB01000014 | 1568  | 1981  | - |
| us-trep | AGEB01000014 | 2113  | 2301  | - |

---

**Supplementary Table 5.** Summary of the integron genes detected in the draft genomes of 13 *Treponema denticola* strains.

| Strains    | Number of contigs carrying integron cassette genes | Total cassette genes |
|------------|----------------------------------------------------|----------------------|
| al-2       | 9                                                  | 26                   |
| aslm       | 4                                                  | 29                   |
| atcc_33520 | 4                                                  | 31                   |
| atcc_33521 | 6                                                  | 20                   |
| atcc_35404 | 4                                                  | 18                   |
| f0402      | 1                                                  | 23                   |
| h1-t       | 5                                                  | 25                   |
| h-22       | 3                                                  | 38                   |
| myr-t      | 4                                                  | 34                   |
| otk        | 5                                                  | 34                   |
| sp33       | 8                                                  | 24                   |
| sp37       | 6                                                  | 37                   |
| us-trep    | 5                                                  | 32                   |

## References

1. Cambray G, Guerout AM, Mazel D: **Integrans**. *Annu Rev Genet* 2010, **44**:141-166.
2. Couronne O, Poliakov A, Bray N, Ishkhanov T, Ryaboy D, Rubin E, Pachter L, Dubchak I: **Strategies and tools for whole-genome alignments**. *Genome Res* 2003, **13**(1):73-80.
